# Supplementary material
Source: publisher figshare collection journal article supplement (https://plos.figshare.com/articles/dataset/_/1618913)
Supplement: Supplementary file [file 1]

**S1 Table. List of the primers used to carry out *PCR* and sequencing reactions to obtain the first Cyprus mouflon *mtDNA* sequence.**

| Primer pairs for standard PCR           |                                   |                                  |               |       |                          |
|-----------------------------------------|-----------------------------------|----------------------------------|---------------|-------|--------------------------|
| Primer code                             | Forward*                          | Reverse*                         | bp            | Ta °C | Contigs overlapping (bp) |
| CL1-CH1                                 | cccccttccccttaaatatt (16,497)     | tttctgaagatggcggtat (699)        | 843           | 60    | 177                      |
| CL2-CH2                                 | agagtactaccggcaacagc (574)        | tttcatcattcccttgcggt (1,235)     | 681           | 52    | 145                      |
| CL3-CH3                                 | cacgtaaagatgtaggtcaa (754)        | ttgttgattatccccgcct (2,154)      | 1,421         | 52    | 502                      |
| CL4-CH4                                 | tctgaccgtgcaaaggta (2,034)        | tagggtagtgctaggatggg (2,988)     | 974           | 52    | 100                      |
| CL5-CH5                                 | ttctcctagctgtagcttttc (2,803)     | ggctaggttgatggatggaa (4,367)     | 1,585         | 55    | 164                      |
| CL6-CH6                                 | tgctcatctgaattggattcg (4,010)     | tggttggtggtgagttggcta (4,589)    | 600           | 62    | 378                      |
| CL7-CH7                                 | caggcctaatttactcacatg (4,308)     | gcatgtgcggttacaattacg (5,517)    | 1,231         | 52    | 303                      |
| CL8-CH8                                 | caaccaaccacaaaagatatcg (5,378)    | cctccgactgtgaaaagaaag (6,387)    | 1,030         | 57    | 160                      |
| CL9-CH9                                 | acgggcttacttcacgtcag (6,254)      | aaggatggaagagcaatcat (7,261)     | 1,027         | 52    | 153                      |
| CL10-CH10                               | gtcaagattaaattacaggtg (7,000)     | tagggaatagtaagctagga (8,033)     | 1,054         | 52    | 282                      |
| CL11-CH11                               | ttttcaactaaaaatctca (7,862)       | taagtgggtgaatgcctgtt (8,989)     | 1,146         | 55    | 190                      |
| CL12-CH12                               | aaaaagggttctactacggaa (8,863)     | tgtgagggatactgtgaatgc (9,936)    | 1,094         | 60    | 147                      |
| CL13-CH13                               | acgaatgaacccaaaaaggac (9,800)     | caaggaccatggagcctgcaa (10,869)   | 1,090         | 60    | 157                      |
| CL14-CH14                               | ttacacactagcagatcccc (10,647)     | ttattcttgcctgtgtgga (11,937)     | 1,311         | 60    | 243                      |
| L11715-H13606                           | ttaggaacccaaaaattggtgcaa (11,738) | attggtattgttactgggtggt (13,630)  | 1,916         | 64    | 223                      |
| CL15-CH15                               | tatcaccacaatcacaagcc (13,491)     | ggagagagccaaagtttcatc (14,267)   | 797           | 60    | 160                      |
| L14110-H15323                           | gaccaatgatatgaaaaccatcg (14,133)  | gttctcctctctggtttacaaga (15,352) | 1,243         | 54    | 158                      |
| CL16-CH16                               | agccagttgaacacccctaca (15,200)    | tgttgggtttatgaacgctc (15,617)    | 438           | 62    | 173                      |
| CR1-CR2                                 | cccactatcaaccccaaagct (15,411)    | tcacttaggcattttcagtcctt (48)     | 1,279         | 58    | 228                      |
| Primer pairs for nested PCR             |                                   |                                  |               |       |                          |
| Primer code                             | Forward*                          | Reverse*                         | bp            | Ta °C | Fragment                 |
| N1-N2                                   | ggttgagcctccaactcaaaa (3,123)     | ctcgtgggttgctgtctttt (4,064)     | 962           | 52    | CL5-CH5                  |
| N3-N4                                   | ttattctgtcactgcaaaca (12,159)     | tttgggggattgttattggg (13,191)    | 1,053         | 60    | L11715-H13606            |
| Primers exclusively used for sequencing |                                   |                                  |               |       |                          |
| Primer code                             | Sequence*                         | Sequencing direction             | Fragment      |       |                          |
| HS1                                     | tttttgtaaacaggcggg (1,945)        | Counterclockwise                 | CL3-CH3       |       |                          |
| LS1                                     | tattaatatccctaattcc (8,165)       | Clockwise                        | CL11-CH11     |       |                          |
| LS2                                     | aaactccaactatgaacg (11,182)       | Clockwise                        | CL14-CH14     |       |                          |
| LS3                                     | taccttctagaaacatgaaa (14,499)     | Clockwise                        | L14110-H15323 |       |                          |
| HS2                                     | tcattaataagttacccc (16,147)       | Counterclockwise                 | CR1-CR2       |       |                          |
