# Supplementary material
Source: publisher figshare collection journal article supplement (https://plos.figshare.com/articles/dataset/_/1618913)
Supplement: Supplementary file [file 1]

**S3 Table. Frequencies distributions of the four Bayesian genetic groups found in the present study for *D-loop* region.**

| Cluster | Specimens                                                                                                | N  | %    |
|---------|----------------------------------------------------------------------------------------------------------|----|------|
| G 1     | ANM_4, ANM_5, ANM_6, RA_1, RA_2                                                                          | 5  | 15.6 |
| G 2     | RD_1, RD_2                                                                                               | 2  | 6.3  |
| G 3     | CHS_1, CHS_2, COM_1, COM_2, EUM_1, EUM_2, RB_1, RB_2, SAM_1,<br>SAM_2, SAM_3, SAM_4, SAM_5, SAS_1, SAS_2 | 15 | 46.9 |
| G 4     | RE_1, RE_2, RC_1, RC_2, CYM_1, CYM_2, CYM_3, ANM_1, ANM_2, ANM_3                                         | 10 | 31.2 |
