# Supplementary material
Source: publisher figshare collection journal article supplement (https://plos.figshare.com/articles/dataset/_/1618913)
Supplement: Supplementary file [file 1]

**S2 Table. Estimates of evolutionary divergence between whole genome (28S) sequences.**

|      | RD_1  | RD_2  | RB_1  | RB_2  | EUM   | RA_1  | RA_2  | RC_1  | RC_2  | RE_1  | RE_2  | CYM   |
|------|-------|-------|-------|-------|-------|-------|-------|-------|-------|-------|-------|-------|
| RD_1 |       | 0,000 | 0,001 | 0,001 | 0,001 | 0,001 | 0,001 | 0,001 | 0,001 | 0,001 | 0,001 | 0,001 |
| RD_2 | 0,000 |       | 0,001 | 0,001 | 0,001 | 0,001 | 0,001 | 0,001 | 0,001 | 0,001 | 0,001 | 0,001 |
| RB_1 | 0,007 | 0,007 |       | 0,000 | 0,000 | 0,001 | 0,001 | 0,001 | 0,001 | 0,001 | 0,001 | 0,001 |
| RB_2 | 0,007 | 0,008 | 0,000 |       | 0,000 | 0,001 | 0,001 | 0,001 | 0,001 | 0,001 | 0,001 | 0,001 |
| EUM  | 0,007 | 0,008 | 0,001 | 0,000 |       | 0,001 | 0,001 | 0,001 | 0,001 | 0,001 | 0,001 | 0,001 |
| RA_1 | 0,007 | 0,007 | 0,005 | 0,005 | 0,005 |       | 0,000 | 0,001 | 0,001 | 0,001 | 0,001 | 0,001 |
| RA_2 | 0,006 | 0,007 | 0,005 | 0,005 | 0,005 | 0,000 |       | 0,001 | 0,001 | 0,001 | 0,001 | 0,001 |
| RC_1 | 0,010 | 0,010 | 0,011 | 0,011 | 0,011 | 0,010 | 0,009 |       | 0,000 | 0,001 | 0,001 | 0,001 |
| RC_2 | 0,010 | 0,011 | 0,011 | 0,011 | 0,011 | 0,010 | 0,010 | 0,001 |       | 0,000 | 0,000 | 0,001 |
| RE_1 | 0,010 | 0,010 | 0,010 | 0,010 | 0,010 | 0,009 | 0,009 | 0,003 | 0,003 |       | 0,000 | 0,001 |
| RE_2 | 0,010 | 0,011 | 0,010 | 0,010 | 0,010 | 0,010 | 0,009 | 0,003 | 0,003 | 0,001 |       | 0,001 |
| CYM  | 0,011 | 0,011 | 0,011 | 0,011 | 0,011 | 0,010 | 0,010 | 0,005 | 0,005 | 0,005 | 0,005 |       |
