# Supplementary material
Source: publisher figshare collection journal article supplement (https://plos.figshare.com/articles/dataset/_/1618913)
Supplement: Supplementary file [file 1]

**S4 Table. Estimates of evolutionary divergence between *D-loop* sequences.**

|       | CYM_2 | CYM_1 | CYM_3 | ANM_3 | ANM_2 | ANM_1 | RB_1  | RB_2  | RE_1  | RE_2  | RC_1  | RC_2  | RD_1  | RD_2  | RA_1  | RA_2  | ANM_5 | ANM_4 | ANM_6 |
|-------|-------|-------|-------|-------|-------|-------|-------|-------|-------|-------|-------|-------|-------|-------|-------|-------|-------|-------|-------|
| CYM_2 |       | 0.001 | 0.002 | 0.003 | 0.003 | 0.003 | 0.006 | 0.006 | 0.005 | 0.005 | 0.004 | 0.004 | 0.006 | 0.006 | 0.006 | 0.006 | 0.006 | 0.006 | 0.006 |
| CYM_1 | 0.001 |       | 0.002 | 0.004 | 0.004 | 0.004 | 0.006 | 0.006 | 0.005 | 0.005 | 0.004 | 0.004 | 0.006 | 0.006 | 0.006 | 0.006 | 0.006 | 0.006 | 0.006 |
| CYM_3 | 0.006 | 0.007 |       | 0.003 | 0.003 | 0.003 | 0.006 | 0.006 | 0.005 | 0.005 | 0.004 | 0.004 | 0.006 | 0.006 | 0.006 | 0.006 | 0.006 | 0.006 | 0.006 |
| ANM_3 | 0.014 | 0.015 | 0.010 |       | 0.000 | 0.000 | 0.006 | 0.006 | 0.004 | 0.004 | 0.004 | 0.004 | 0.006 | 0.006 | 0.006 | 0.006 | 0.006 | 0.006 | 0.006 |
| ANM_2 | 0.014 | 0.015 | 0.010 | 0.000 |       | 0.000 | 0.006 | 0.006 | 0.004 | 0.004 | 0.004 | 0.004 | 0.006 | 0.006 | 0.006 | 0.006 | 0.006 | 0.006 | 0.006 |
| ANM_1 | 0.014 | 0.015 | 0.010 | 0.000 | 0.000 |       | 0.006 | 0.006 | 0.004 | 0.004 | 0.004 | 0.004 | 0.006 | 0.006 | 0.006 | 0.006 | 0.006 | 0.006 | 0.006 |
| RB_1  | 0.036 | 0.035 | 0.042 | 0.041 | 0.041 | 0.041 |       | 0.000 | 0.006 | 0.006 | 0.006 | 0.006 | 0.006 | 0.006 | 0.006 | 0.006 | 0.006 | 0.006 | 0.006 |
| RB_2  | 0.036 | 0.035 | 0.042 | 0.041 | 0.041 | 0.041 | 0.000 |       | 0.006 | 0.006 | 0.006 | 0.006 | 0.006 | 0.006 | 0.006 | 0.006 | 0.006 | 0.006 | 0.006 |
| RE_1  | 0.027 | 0.028 | 0.025 | 0.020 | 0.020 | 0.020 | 0.034 | 0.034 |       | 0.000 | 0.004 | 0.004 | 0.006 | 0.006 | 0.006 | 0.005 | 0.006 | 0.006 | 0.006 |
| RE_2  | 0.027 | 0.028 | 0.025 | 0.020 | 0.020 | 0.020 | 0.034 | 0.034 | 0.000 |       | 0.004 | 0.004 | 0.006 | 0.006 | 0.006 | 0.005 | 0.006 | 0.006 | 0.006 |
| RC_1  | 0.022 | 0.023 | 0.020 | 0.017 | 0.017 | 0.017 | 0.039 | 0.039 | 0.018 | 0.018 |       | 0.000 | 0.006 | 0.006 | 0.007 | 0.006 | 0.006 | 0.006 | 0.006 |
| RC_2  | 0.022 | 0.023 | 0.020 | 0.017 | 0.017 | 0.017 | 0.039 | 0.039 | 0.018 | 0.018 | 0.000 |       | 0.006 | 0.006 | 0.007 | 0.006 | 0.006 | 0.006 | 0.006 |
| RD_1  | 0.037 | 0.038 | 0.041 | 0.038 | 0.038 | 0.038 | 0.034 | 0.034 | 0.032 | 0.032 | 0.036 | 0.036 |       | 0.000 | 0.006 | 0.006 | 0.006 | 0.006 | 0.006 |
| RD_2  | 0.037 | 0.038 | 0.041 | 0.038 | 0.038 | 0.038 | 0.034 | 0.034 | 0.032 | 0.032 | 0.036 | 0.036 | 0.000 |       | 0.006 | 0.006 | 0.006 | 0.006 | 0.006 |
| RA_1  | 0.042 | 0.041 | 0.046 | 0.043 | 0.043 | 0.043 | 0.037 | 0.037 | 0.038 | 0.038 | 0.043 | 0.043 | 0.038 | 0.038 |       | 0.002 | 0.002 | 0.002 | 0.002 |
| RA_2  | 0.039 | 0.038 | 0.043 | 0.040 | 0.040 | 0.040 | 0.032 | 0.032 | 0.033 | 0.033 | 0.040 | 0.040 | 0.034 | 0.034 | 0.005 |       | 0.002 | 0.002 | 0.002 |
| ANM_5 | 0.040 | 0.039 | 0.044 | 0.041 | 0.041 | 0.041 | 0.035 | 0.035 | 0.036 | 0.036 | 0.041 | 0.041 | 0.034 | 0.034 | 0.004 | 0.003 |       | 0.000 | 0.000 |
| ANM_4 | 0.040 | 0.039 | 0.044 | 0.041 | 0.041 | 0.041 | 0.035 | 0.035 | 0.036 | 0.036 | 0.041 | 0.041 | 0.034 | 0.034 | 0.004 | 0.003 | 0.000 |       | 0.000 |
| ANM_6 | 0.040 | 0.039 | 0.044 | 0.041 | 0.041 | 0.041 | 0.035 | 0.035 | 0.036 | 0.036 | 0.041 | 0.041 | 0.034 | 0.034 | 0.004 | 0.003 | 0.000 | 0.000 |       |
